# Supplementary material for: Novel design of highly [110]-oriented barium titanate nanorod array and its application in nanocomposite capacitors
Source: Royal Society of Chemistry journal article supplement (doi:10.1039/c6nr09250k), 2017-01-01

# Supporting Information

## **Novel Design of Highly [110]-Oriented Barium Titanate Nanorod Array and Its High Energy Density and Ultrafast Charge-Discharge Ability in Nanocomposites**

Lingmin Yao<sup>a</sup>, Zhongbin Pan<sup>b</sup>, Jiwei Zhai<sup>\*b</sup>, Haydn H.D. Chen<sup>a\*</sup>

*<sup>a</sup>Institute of Applied Physics and Materials Engineering, Faculty of Science and Technology, University of Macau, Macao SAR 999078, China*

*<sup>b</sup>Key Laboratory of Advanced Civil Engineering Materials of Ministry of Education, Functional Materials Research Laboratory, School of Materials Science & Engineering, Tongji University, 4800 Caoan Road, Shanghai 201804, China.*

\* [haydnchen@umac.mo](mailto:haydnchen@umac.mo) (Haydn H.D. Chen) and [apzhai@tongji.edu.cn](mailto:apzhai@tongji.edu.cn) (Jiwei, Zhai)

---

Figure.S1 EDX of TO nanorod array at 180 °C for 2.5 h

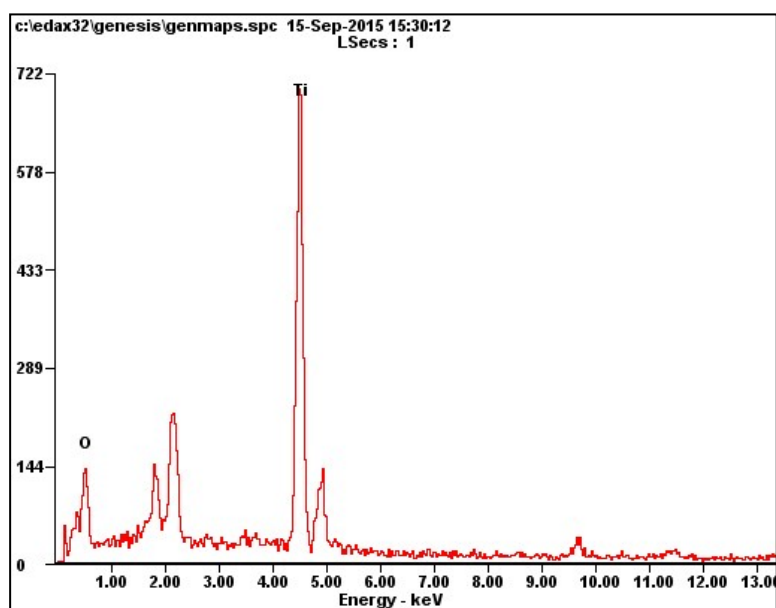

Figure S2 EDX of alkaline-treated TO treated at 150 °C for 3 h with 8 M NaOH

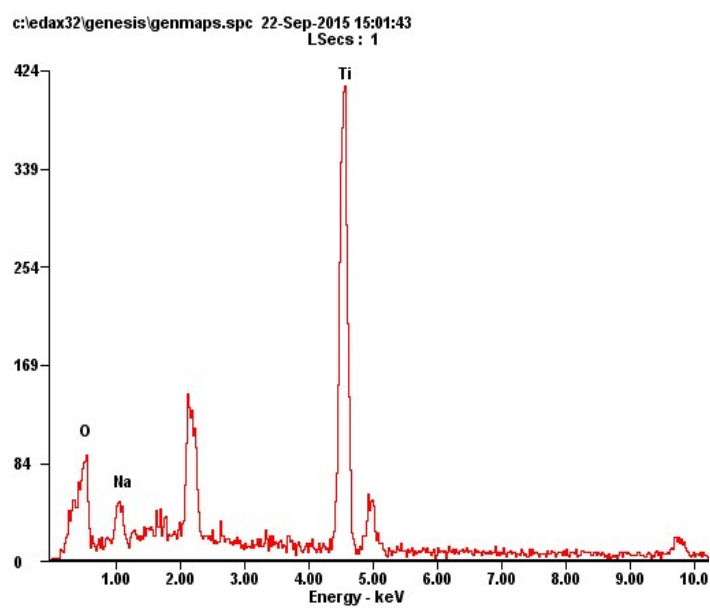

Figure S3 EDX of BT nanorod array grown in 0.1 M Ba(OH)<sub>2</sub>, 70 ml DI, 30ml glycol ether and 0.25 M KNO<sub>3</sub> at 210 °C for 6h (The element of Cu comes from the Copper screen)

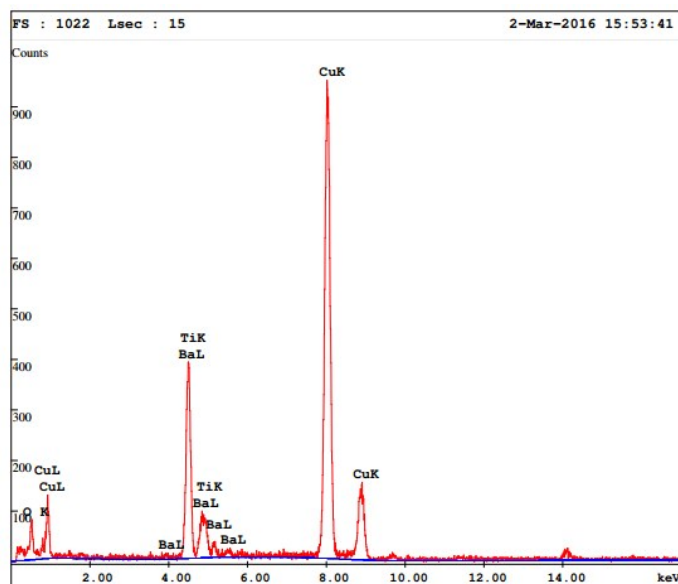

Figure S4 the charge-discharge circuit

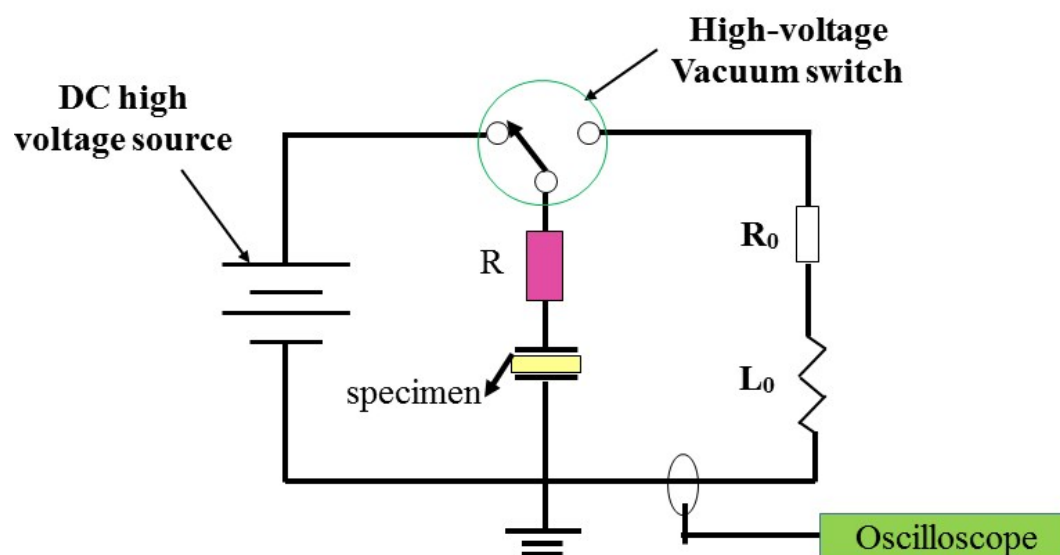

Supplement: c6nr09250k1.pdf [file c6nr09250k1.pdf]
